# **Evaluation of lockdown impact on SARS-CoV-2 dynamics through viral genome quantification in Paris wastewaters**

3

4 **Wurtzer S<sup>1</sup>, Marechal V<sup>2+</sup>, Mouchel JM<sup>3</sup>, Maday Y<sup>4+</sup>, Teyssou R<sup>5</sup>, Richard E<sup>1</sup>, Almayrac JL<sup>6</sup> & Moulin**  
5 **L<sup>1\*</sup>.**

6 <sup>1</sup> Eau de Paris, R&D Laboratory, DRDQE 33 Avenue Jean Jaurès 94200 Ivry/Seine

7 <sup>2</sup> Sorbonne Université, INSERM, Centre de Recherche Saint-Antoine, F-75012, Paris, France

8 <sup>3</sup> Sorbonne Université, CNRS, EPHE, UMR 7619 Metis, 75005 PARIS, e-LTER Zone Atelier

9 Seine, France<sup>4</sup> Sorbonne Université, CNRS, Université de Paris, Laboratoire Jacques-Louis Lions  
10 (LJLL), F-75005 Paris, France et Institut Universitaire de France

11 <sup>5</sup> Department of Virology, Institut de Recherche Biomédicale des Armées. 1Place du Général  
12 Valérie André. BP73. 91223 BRETIGNY-SUR-ORGE

13 <sup>6</sup> SIAAP, Service process-laboratoire SIAAP site Seine Amont

14 <sup>+</sup> VM and YM are co-founders of the COVID-IA initiative

15

16 Corresponding author: \* [laurent.moulin@eaudeparis.fr](mailto:laurent.moulin@eaudeparis.fr)

17

18 **Keywords: SARS-CoV-2, COVID-19, lockdown, quantification, wastewater**

19

## 20 Summary

21 SARS-CoV-2 is the etiological agent of COVID-19. Most of SARS-CoV-2 carriers are assumed to exhibit  
 22 no or mild non-specific symptoms. Thus, they may contribute to the rapid and mostly silent  
 23 circulation of the virus among humans. Since SARS-CoV-2 can be detected in stool samples it has  
 24 recently been proposed to monitor SARS-CoV-2 in wastewaters (WW) as a complementary tool to  
 25 investigate virus circulation in human populations. In the present work we assumed that the  
 26 quantification of SARS-CoV-2 genomes in wastewaters should correlate with the number of  
 27 symptomatic or non-symptomatic carriers. To test this hypothesis, we performed a time-course  
 28 quantitative analysis of SARS-CoV-2 by RT-qPCR in raw wastewater samples collected from several  
 29 major wastewater treatment plant (WWTP) of the Parisian area. The study was conducted from 5  
 30 March to 23 April 2020, therefore including the lockdown period in France (since 17 March 2020).  
 31 We confirmed that the increase of genome units in raw wastewaters accurately followed the  
 32 increase of human COVID-19 cases observed at the regional level. Of note, the viral genomes could  
 33 be detected before the beginning of the exponential growth of the epidemic. As importantly, a  
 34 marked decrease in the quantities of genomes units was observed concomitantly with the reduction  
 35 in the number of new COVID-19 cases which was an expected consequence of the lockdown. As a  
 36 conclusion, this work suggests that a quantitative monitoring of SARS-CoV-2 genomes in wastewaters  
 37 should bring important and additional information for an improved survey of SARS-CoV-2 circulation  
 38 at the local or regional scale.

39

## 40 Introduction

41 SARS-Cov-2 is a positive-sense single-stranded RNA virus of the *Coronaviridae* family and the etiologic  
 42 agent of COVID-19, a globalized infection affecting more than 2.5 million people worldwide and  
 43 causing more than 180 000 deaths in total, including more than 160 000 cases in France on April 22,  
 44 2020. Virus transmission is mainly associated with the projection of respiratory droplets although a  
 45 possible contamination through aerosols, contaminated hands and inert surfaces is likely. SARS-Cov-  
 46 2 causes severe complications mostly in elderly or people suffering from comorbidity factors (such as  
 47 diabetes, hypertension, obesity, acquired or iatrogenic immunosuppression).

48 The viral infection may initiate in the upper respiratory and/or the lower respiratory tracts. Similarly  
 49 to SARS-CoV-1 (1) and MERS-CoV (2), SARS-CoV-2 genome was also detected in blood and stools (3–  
 50 5). This argue for a possible enteric phase of the infection although isolation of infectious virus from  
 51 feces seems difficult (6). Of note diarrhea have been reported in some cases of COVID-19 (6).  
 52 Importantly, SARS-CoV-2 genomes could be detected in feces several weeks after it could not be  
 53 detected anymore in oral swabs, suggesting that viral excretion in tools may be longer than oral  
 54 secretion (7). The presence of viral genomes in stools may open new perspective in the survey of  
 55 SARS-CoV-2 carriers. It would notably suggest that the virus could possibly be transmitted by a feco-  
 56 oral route, an hypothesis that should likely deserve a careful examination (8) .

57 Management of an epidemic, such as lockdown decision, requires a careful monitoring of the  
 58 infected population by detecting the virus in carriers through massive or targeted testing.  
 59 Investigating the proportion of people that have been infected through sero-epidemiological surveys  
 60 is equally important but antibodies against SARS-CoV-2 will appear only weeks after initial infection  
 61 (9,10). In the case of COVID-19, due to the lack of systematic and repeated screening of the  
 62 population, the precise number of infected people is difficult to assess, especially because of the high  
 63 proportion of infected people that exhibit only few or no symptoms but could secrete and silently  
 64 transmit the virus (11–14). Depending on screening kit availability and public health policy, testing  
 65 strategy varies between countries which may explain some discrepancy between worldwide data.  
 66 Estimating the effective proportion of infected individuals is essential for monitoring the epidemic  
 67 spread and to propose adapted and efficient control procedures, such as partial or total lockdown.  
 68 France went into lockdown on the March 17 2020, a decision that was expected to have a major  
 69 impact on virus circulation especially when asymptomatic carriers are considered to have a strong  
 70 impact on virus transmission. This decision was motivated by the urgent need to limit exposure of so-  
 71 called fragile people who are at highest risk to develop the most severe forms of the disease  
 72 (11,13,15).

73 Analysis of raw wastewaters collected at the inlet of wastewater treatment plants (WWTP) may  
 74 provide essential information on the health of the human population that is connected to the WWTP.  
 75 It may notably allow measurement and identification of pathogens or drugs that may be difficult to  
 76 assess otherwise. Using this method, the European Monitoring Center for Drugs and Drug Addiction  
 77 follows drugs and their metabolites in the wastewater of several European cities (16). In addition  
 78 previous works on human enteric viruses in urban river and in raw and treated wastewaters  
 79 demonstrated that the presence of these viruses was directly linked to epidemic state in the  
 80 population (17,18). This strongly argue for a close monitoring of fecal viruses in wastewater as a new  
 81 and complementary tool for investigating human epidemics.

82 Enveloped viruses like coronaviruses are expected to be less resistant than naked viruses that are  
 83 usually tracked in waste and environmental waters. There is still little information on the persistence  
 84 of coronaviruses in waters and most of our current knowledge has been inferred from experiments  
 85 made on surrogate viruses. Recent data suggested that infectious SARS-CoV-2 is particularly resistant  
 86 in environmental conditions: 3.5 half-life days in the air, 7 days on some surfaces, any reduction at  
 87 pH between 3 and 10 (6,19). Previous studies on SARS-CoV-1 indicated a significant persistence at 4  
 88 °C even in wastewater (more than 20 days), or a persistence of at least 1 or 2 days at summer  
 89 temperatures (1,20,21).

90 Altogether these results led us and others to suggest that the detection of SARS-CoV-2 genomes in  
 91 wastewater could provide an early and global tool to monitor virus circulation in addition to human  
 92 epidemiological data (22–24).

93 A first publication underlined the putative benefit of a qualitative approach for monitoring SARS-CoV-  
 94 2 in wastewaters (24). Other studies used quantitative measurements of viral genomes but the  
 95 survey only started at the apex of the epidemic (25). Here, we used a specific reverse-transcription  
 96 quantitative PCR (RT-qPCR) method to precisely quantify SARS-CoV-2 genome equivalents in raw  
 97 wastewaters of the Parisian area. A 2-months survey covering the lockdown period allowed to  
 98 observe an increase and a decrease in the total quantities of viral genomes that paralleled the  
 99 number of new COVID-19 cases in the same region. To our knowledge, this is the first real-time  
 100 indirect survey of SARS-CoV-2 circulation during a lockdown period.

## Methods

### Sample collection

Three WWTP (more than 100 000 inhabitants linked to the station from the Parisian area were sampled since the start of the epidemic (March 5<sup>th</sup>, 2020). Samples were kept at 4°C and processed less than 24 hours after sampling.

### Concentration methods

Samples were homogenized, then 11 ml were centrifugated at 200 000 x g for 1 hour at +4°C. Viral pellets were resuspended in 400 µL of PBS 1X buffer.

200µL of viral concentrate were lysed and extracted using PowerFecal Pro kit (QIAGEN) on a QIASymphony automated extractor (QIAGEN) according to a modified manufacturer's protocol. Extracted nucleic acids were filtered through OneStep PCR inhibitor removal kit (Zymoresearch) according the manufacturer's instructions.

### Molecular detection method

The RT-qPCR primers and PCR conditions used herein have been previously described (26). The amplification was done using Fast virus 1-step Master mix 4x (Lifetechnologies) with oligonucleotide concentrations recommended previously. Detection and quantification were carried on the E gene by RT-qPCR. Positive results were confirmed by amplification of a region located within the gene encoding for the viral RNA-dependent RNA polymerase (RdRp). An internal positive control (IPC) was added to evaluate the presence of residual inhibitors. The detection limit was estimated to be around 10<sup>3</sup> genome units per liter of raw wastewater.

The quantification was performed using a standard curve based on synthetic oligonucleotide corresponding to the full-length amplicon on the E gene (SARS-Cov2 Wuhan-Hu isolate sequence NC\_045512.2). Amplification reaction and fluorescence detection were performed on ViiA7 Real Time PCR system (Lifetechnologies).

### Modelization of Viral RNA excretion

Even if the real number of infected people is unknown, we attempted to compute the expected amount of viral RNA shed in stools, using available information. Since the very beginning of the epidemic, the daily number of patients consulting at the emergency department of greater Paris hospitals and diagnosed with COVID symptoms was published (<https://www.santepubliquefrance.fr/>). Wölfel et al. measured the daily amount of vRNA in swab samples for few patients (27). This data was used as an estimation of viral expression for all infected

people and we also assume that people with symptoms would consult 2 days after the onset of the illness, and that at any moment the number of patients with strong symptoms was proportional to the total number of infected people. Accepting the above hypothesis, the convolution of two dataset (i.e. number of consulting patient and model of excretion) is an emission-proxy, proportional to the total amount of viral RNA shed in stools in a given population.

## Results

Three major wastewater treatment plants (WWTP) managing over 75 000 cubic meters per day, were sampled at the inlet of the plant from March 5<sup>th</sup> to April 23<sup>th</sup> 2020. All processed samples scored positive for the presence of SARS-CoV-2 genomes as assessed by RT-qPCR on the viral E gene. All positive samples were confirmed by RT-qPCR on the viral RdRp gene (Figure 1). The COVID-19 epidemic in the same region was illustrated by various indicators such as the total number of COVID-19 cases treated in the regional hospitals, the accumulation of hospitalized patients or the daily death toll linked to COVID 19. Based on these epidemiologic statistics and on published data on virus shedding quantity and delay, an estimated indicator of the viral excretion in the region was calculated and compared to the viral load in wastewaters.

Briefly, the concentration of vRNA in raw wastewater was around  $5 \cdot 10^4$  genome units /L on the 5<sup>th</sup> of March 2020. At the same date, less than 10 COVID-19 confirmed patients were reported and only 404 individuals were tested positive in France. For the Parisian area more specifically, 91 confirmed cases were reported at that time (on a total number of more than 12 million inhabitants) and no death was recorded. Altogether this information indicated that the COVID-19 epidemic was at an early stage in the Parisian area.

The time-course monitoring of viral load in WW displayed an exponential increase (from  $5 \cdot 10^4$  GU/L on March 5<sup>th</sup> to  $3 \cdot 10^6$  GU/L, a 2-log increase in average). A peak was observed on the 9<sup>th</sup> of April, followed by a marked decrease (1-log reduction in average). The shape of the concentration curve was reminiscent of the disease dynamics at the regional level, with an 8-day temporal shift.

Altogether these results underline that essential information could be obtain from wastewater epidemical monitoring, such as early starting of the epidemics, evolution of the infections, and impact of the lockdown procedures.

## Discussion

It is demonstrated here for the first time that a quantitative detection of SARS-CoV-2 in wastewaters could reflect the circulation of the virus in human populations in the Parisian area, a region called Ile-de-France. Since similar results were obtained from three independent and distant WWTP around Paris with striking similarities, the time-course survey that has been done is likely to be a direct reflect of SARS-CoV-2 dynamic in Parisian inhabitants that are connected to these WWTP. It is to note that at home lockdown is effective since March 17<sup>th</sup> 2020, therefore limiting daily transport. Importantly no significant rain fall was recorded in the Parisian area that could have had an impact on virus concentration in wastewaters. More surprisingly this decrease stopped after 7 days, and the virus concentration has been stable since. This plateau is intriguing, although the emission-proxy suggests that it can partly be explained by the duration of the virus shedding period, and several hypotheses can be made. First, one may suggest that many infected people are still secreting viruses in their feces whereas the virus is not present anymore in the ORL region. This hypothesis has recently been confirmed in Chinese patients with longer periods of excretion than reported by Wölfel (7). Second, lockdown has been partial since some specific workers have been allowed to pursue essential activities that were not compatible with homeworking. These people are usually not considered at risk of severe infections (i.e. more pauci-symptomatic case), but they may promote virus circulation at a low level notably in their family if they do not strictly respect hands cleaning and mask wearing. Third, one may suggest that lockdown is not respected by few people that maintain virus circulation at a low but significant level. Virus survey in the same WWTP will likely provide some answers in the following weeks.

The observed delay between epidemiological curves in humans compared to virus quantification in wastewaters is probably due to several parameters. This may include the effective number of infected people, the timing and temporal kinetics of viral shredding in feces and other causes that are still to be investigated. Nevertheless, our data are in very good agreement with epidemiological parameters such as the number of confirmed COVID-19 patients or our excretion model. To that respect, let us note that our study provides a strong indirect evidence for a significant reduction of virus transmission in response to lockdown. According to our results, the number of people producing SARS-CoV-2 is likely underestimated when based on individual testing, especially during a pandemic where a limited quantity of virological tests did not allow for extensive testing so far. As a comparison the quantity of human enteric virus concentration in raw wastewater is around  $10^6$  per liter (17).

Epidemiological investigations that have been conducted on the Diamond Princess cruise ship suggested that less than 20% of infected people were asymptomatic (12). Most of the infected people were reported to exhibit moderate nonspecific symptoms including fever, headache, body aches, intense tiredness and/or dry cough. However infected people can produce SARS-CoV-2 for a few days before the onset of symptoms and up to several days after recovery (2,7,28). Another extensive study based on Iceland population shows that 43% of SARS-CoV-2 positive patients did not report any symptoms (29). In this context, a clear majority of infected carriers may silently contaminate sensitive people. This led us to suggest that the contamination of raw wastewaters may occur before the significative appearance of clinical cases. The evolution of SARS-CoV-2 viral load in wastewater was in good agreement with the dynamics of pandemic during the first wave of infection in urbanized area, which is also in agreement with the excretion model that is proposed here. To our knowledge this is the first report demonstrating that the quantitative monitoring of SARS-CoV-2 in raw wastewater is a time-related relevant indicator of the evolution of the health status of a population linked to a sewage network. This quantitative approach was especially useful to unveiled the dynamics of the pandemic and follow impact of government measures such as containment.

To finish, this data, if carefully utilized, could help to describe the proportion of SARS-CoV-2 excretors during all the monitored pandemic event and allow to calculate the immunity of the population, especially at the local level.

## Conclusions

Our results strongly argue for the use of a quantitative monitoring of SARS-CoV-2 genomes in urban wastewaters. This would also argue for a long-time conservation of wastewater samples in dedicated local i.e. wastewater-bank, which would allow a retrospective investigation of pathogens circulation. Additionally, wastewaters survey may provide an alternative and possibly early tool to detect pathogens in populations when investigations in humans are difficult to conduct for logistic, ethical or economic reasons, notably in poor countries that are strongly exposed to COVID-19 epidemic.



221

## 222 Reference

- 223 1. Wang X-W, Li J-S, Guo T-K, Zhen B, Kong Q-X, Yi B, et al. Concentration and detection of SARS  
224 coronavirus in sewage from Xiao Tang Shan Hospital and the 309th Hospital. *Journal of Virological*  
225 *Methods*. sept 2005;128(1-2):156-61.
- 226 2. Zhou J, Li C, Zhao G, Chu H, Wang D, Yan HH-N, et al. Human intestinal tract serves as an alternative  
227 infection route for Middle East respiratory syndrome coronavirus. *Sci Adv*. nov  
228 2017;3(11):eaao4966.
- 229 3. Zhang W, Du R-H, Li B, Zheng X-S, Yang X-L, Hu B, et al. Molecular and serological investigation of  
230 2019-nCoV infected patients: implication of multiple shedding routes. *Emerging Microbes &*  
231 *Infections*. 1 janv 2020;9(1):386-9.
- 232 4. Zhang H, Kang Z, Gong H, Xu D, Wang J, Li Z, et al. The digestive system is a potential route of 2019-  
233 nCov infection: a bioinformatics analysis based on single-cell transcriptomes [Internet].  
234 *Microbiology*; 2020 janv [cité 28 avr 2020]. Disponible sur:  
235 <http://biorxiv.org/lookup/doi/10.1101/2020.01.30.927806>
- 236 5. Wu Y, Guo C, Tang L, Hong Z, Zhou J, Dong X, et al. Prolonged presence of SARS-CoV-2 viral RNA in  
237 faecal samples. *Lancet Gastroenterol Hepatol*. 19 mars 2020;
- 238 6. Chen N, Zhou M, Dong X, Qu J, Gong F, Han Y, et al. Epidemiological and clinical characteristics of 99  
239 cases of 2019 novel coronavirus pneumonia in Wuhan, China: a descriptive study. *The Lancet*. févr  
240 2020;395(10223):507-13.
- 241 7. Chen C, Gao G, Xu Y, Pu L, Wang Q, Wang L, et al. SARS-CoV-2–Positive Sputum and Feces After  
242 Conversion of Pharyngeal Samples in Patients With COVID-19. *Ann Intern Med* [Internet]. 30 mars  
243 2020 [cité 28 avr 2020]; Disponible sur: [https://annals.org/aim/fullarticle/2764036/sars-cov-2-](https://annals.org/aim/fullarticle/2764036/sars-cov-2-positive-sputum-feces-after-conversion-pharyngeal-samples)  
244 [positive-sputum-feces-after-conversion-pharyngeal-samples](https://annals.org/aim/fullarticle/2764036/sars-cov-2-positive-sputum-feces-after-conversion-pharyngeal-samples)
- 245 8. Yeo C, Kaushal S, Yeo D. Enteric involvement of coronaviruses: is faecal–oral transmission of SARS-  
246 CoV-2 possible? *The Lancet Gastroenterology & Hepatology*. avr 2020;5(4):335-7.
- 247 9. Grzelak L, Temmam S, Planchais C, Demeret C, Huon C, Guivel F, et al. SARS-CoV-2 serological  
248 analysis of COVID-19 hospitalized patients, pauci-symptomatic individuals and blood donors.  
249 [Internet]. *Infectious Diseases (except HIV/AIDS)*; 2020 avr [cité 28 avr 2020]. Disponible sur:  
250 <http://medrxiv.org/lookup/doi/10.1101/2020.04.21.20068858>
- 251 10. Assis RR de, Jain A, Nakajima R, Jasinskas A, Felgner J, Obiero JM, et al. Analysis of SARS-CoV-2  
252 Antibodies in COVID-19 Convalescent Plasma using a Coronavirus Antigen Microarray [Internet].  
253 *Immunology*; 2020 avr [cité 28 avr 2020]. Disponible sur:  
254 <http://biorxiv.org/lookup/doi/10.1101/2020.04.15.043364>
- 255 11. Li R, Pei S, Chen B, Song Y, Zhang T, Yang W, et al. Substantial undocumented infection facilitates the  
256 rapid dissemination of novel coronavirus (SARS-CoV2). *Science*. 16 mars 2020;eabb3221.
- 257 12. Mizumoto K, Kagaya K, Zarebski A, Chowell G. Estimating the asymptomatic proportion of  
258 coronavirus disease 2019 (COVID-19) cases on board the Diamond Princess cruise ship, Yokohama,  
259 Japan, 2020. *Eurosurveillance* [Internet]. 12 mars 2020 [cité 28 avr 2020];25(10). Disponible sur:  
260 <https://www.eurosurveillance.org/content/10.2807/1560-7917.ES.2020.25.10.2000180>

- 261 13. Al-Tawfiq JA. Asymptomatic coronavirus infection: MERS-CoV and SARS-CoV-2 (COVID-19). *Travel*  
262 *Med Infect Dis.* 27 févr 2020;101608.
- 263 14. Rothe C, Schunk M, Sothmann P, Bretzel G, Froeschl G, Wallrauch C, et al. Transmission of 2019-  
264 nCoV Infection from an Asymptomatic Contact in Germany. *N Engl J Med.* 5 mars  
265 2020;382(10):970-971.
- 266 15. Ng SC, Tilg H. COVID-19 and the gastrointestinal tract: more than meets the eye. *Gut.* 9 avr 2020;
- 267 16. González-Mariño I, Zuccato E, Santos MM, Castiglioni S. Monitoring MDMA metabolites in urban  
268 wastewater as novel biomarkers of consumption. *Water Research.* mai 2017;115:1-8.
- 269 17. Bisseux M, Colombet J, Mirand A, Roque-Afonso A-M, Abravanel F, Izopet J, et al. Monitoring human  
270 enteric viruses in wastewater and relevance to infections encountered in the clinical setting: a one-  
271 year experiment in central France, 2014 to 2015. Vol. 23, *Eurosurveillance.* 2018. p. 17-00237.
- 272 18. Prevost B, Lucas FS, Ambert-Balay K, Pothier P, Moulin L, Wurtzer S. Deciphering the Diversities of  
273 Astroviruses and Noroviruses in Wastewater Treatment Plant Effluents by a High-Throughput  
274 Sequencing Method. *Appl Environ Microbiol.* oct 2015;81(20):7215-7222.
- 275 19. van Doremalen N, Bushmaker T, Morris DH, Holbrook MG, Gamble A, Williamson BN, et al. Aerosol  
276 and Surface Stability of SARS-CoV-2 as Compared with SARS-CoV-1. *N Engl J Med.* 17 mars 2020;
- 277 20. Gundy PM, Gerba CP, Pepper IL. Survival of Coronaviruses in Water and Wastewater. *Food Environ*  
278 *Virol.* mars 2009;1(1):10.
- 279 21. Ye Y, Ellenberg RM, Graham KE, Wigginton KR. Survivability, Partitioning, and Recovery of Enveloped  
280 Viruses in Untreated Municipal Wastewater. *Environ Sci Technol.* 17 mai 2016;50(10):5077-5085.
- 281 22. Lodder W, de Roda Husman AM. SARS-CoV-2 in wastewater: potential health risk, but also data  
282 source. *Lancet Gastroenterol Hepatol.* 1 avr 2020;
- 283 23. Mallapaty S. How sewage could reveal true scale of coronavirus outbreak. *Nature.* avr  
284 2020;580(7802):176-177.
- 285 24. Medema G, Heijnen L, Elsinga G, Italiaander R, Brouwer A. Presence of SARS-Coronavirus-2 in  
286 sewage. *medRxiv.* 1 janv 2020;2020.03.29.20045880.
- 287 25. Wu F, Xiao A, Zhang J, Gu X, Lee WL, Kauffman K, et al. SARS-CoV-2 titers in wastewater are higher  
288 than expected from clinically confirmed cases. *medRxiv.* 1 janv 2020;2020.04.05.20051540.
- 289 26. Corman VM, Landt O, Kaiser M, Molenkamp R, Meijer A, Chu DKW, et al. Detection of 2019 novel  
290 coronavirus (2019-nCoV) by real-time RT-PCR. *Euro Surveill.* janv 2020;25(3).
- 291 27. Wölfel R, Corman VM, Guggemos W, Seilmaier M, Zange S, Müller MA, et al. Virological assessment  
292 of hospitalized patients with COVID-2019. *Nature [Internet].* 1 avr 2020 [cité 28 avr 2020];  
293 Disponible sur: <http://www.nature.com/articles/s41586-020-2196-x>
- 294 28. Atkinson B, Petersen E. SARS-CoV-2 shedding and infectivity. *The Lancet.* avr  
295 2020;395(10233):1339-1340.
- 296 29. Gudbjartsson DF, Helgason A, Jonsson H, Magnusson OT, Melsted P, Norddahl GL, et al. Spread of  
297 SARS-CoV-2 in the Icelandic Population. *N Engl J Med.* 14 avr 2020;NEJMoa2006100.

299

## 300 **Acknowledgment**

301 Olivier Rousselot (director of “laboratoires et de l'environnement”, SIAAP) is acknowledged for his  
 302 support and critical reading of the manuscript. Vincent Rocher for management of sampling at the  
 303 SIAAP Innovation department. Technical assistance from the R&D Eau de Paris Laboratory members,  
 304 and Alban Robin for helpful support.

## 305 **Contribution**

306 SW, ER performed the virus measurements; SW, LM started the project; JLA, SW provided samples;  
 307 LM, VM, JMM, SW for the redaction of the manuscript; YM, RT, JLA technical and theoretical discussion  
 308 .

## 309 **Funding**

310 Analysis were carried on the Eau de Paris 2020 Research grant. Samples were provided by SIAAP.

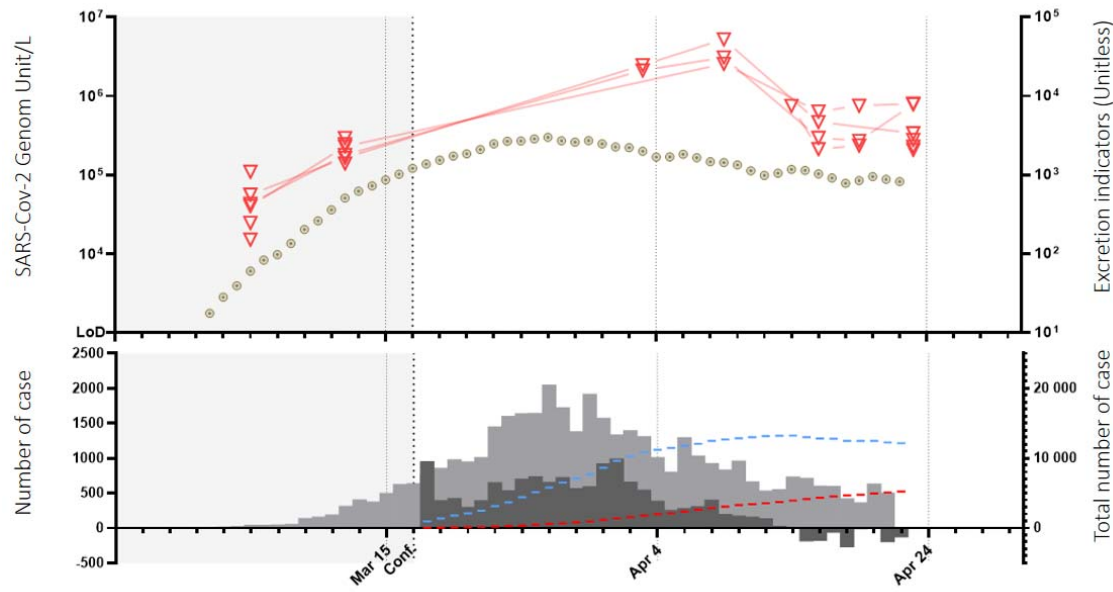

**Figure 1: Upper panel: Quantification of SARS-Cov-2 in wastewater samples in Parisian Area in different WWTP (open inverted red triangles for important WWTP, purple open inverted triangles for smaller WWTP) in circle estimators of the viral excretion.**

**Lower panel : In Light grey area, daily number of consultation for COVID 19 Symptoms in hospital of the Parisian area. Dark grey daily growth of hospitalized patient. Blue bar total hospitalized patient in the Parisian area, red bar cumulative deaths each day, in Parisian area.**

**Both panel : grey background, pre-lockdown period.**

322     **Supplementary data**

323     None

324
