1 **Evaluation of lockdown impact on SARS-CoV-2 dynamics through viral genome**  
2 **quantification in Paris wastewaters**

3

4 **Wurtzer S<sup>1</sup>, Marechal V<sup>2+</sup>, Mouchel JM<sup>3</sup>, Maday Y<sup>4+</sup>, Teyssou R<sup>5</sup>, Richard E<sup>1</sup>, Almayrac JL<sup>6</sup> & Moulin**  
5 **L<sup>1\*</sup>.**

6 <sup>1</sup> Eau de Paris, R&D Laboratory, DRDQE 33 Avenue Jean Jaurès 94200 Ivry/Seine

7 <sup>2</sup> Sorbonne Université, INSERM, Centre de Recherche Saint-Antoine, F-75012, Paris, France

8 <sup>3</sup> Sorbonne Université, CNRS, EPHE, UMR 7619 Metis, 75005 PARIS, e-LTER Zone Atelier

9 Seine, France<sup>4</sup> Sorbonne Université, CNRS, Université de Paris, Laboratoire Jacques-Louis Lions  
10 (LJLL), F-75005 Paris, France et Institut Universitaire de France

11 <sup>5</sup> Department of Virology, Institut de Recherche Biomédicale des Armées. 1Place du Général  
12 Valérie André. BP73. 91223 BRETIGNY-SUR-ORGE

13 <sup>6</sup> SIAAP, Service process-laboratoire SIAAP site Seine Amont

14 <sup>+</sup> VM and YM are co-founders of the COVID-IA initiative

15

16 Corresponding author: \* [laurent.moulin@eaudeparis.fr](mailto:laurent.moulin@eaudeparis.fr)

17

18 **Keywords: SARS-CoV-2, COVID-19, lockdown, quantification, wastewater**

19

## 20 **Summary**

21 SARS-CoV-2 is the etiological agent of COVID-19. Most of SARS-CoV-2 carriers are assumed to exhibit  
22 no or mild non-specific symptoms. Thus, they may contribute to the rapid and mostly silent  
23 circulation of the virus among humans. Since SARS-CoV-2 can be detected in stool samples it has  
24 recently been proposed to monitor SARS-CoV-2 in wastewaters (WW) as a complementary tool to  
25 investigate virus circulation in human populations. In the present work we assumed that the  
26 quantification of SARS-CoV-2 genomes in wastewaters should correlate with the number of  
27 symptomatic or non-symptomatic carriers. To test this hypothesis, we performed a time-course  
28 quantitative analysis of SARS-CoV-2 by RT-qPCR in raw wastewater samples collected from several  
29 major wastewater treatment plant (WWTP) of the Parisian area. The study was conducted from 5  
30 March to 23 April 2020, therefore including the lockdown period in France (since 17 March 2020).  
31 We confirmed that the increase of genome units in raw wastewaters accurately followed the  
32 increase of human COVID-19 cases observed at the regional level. Of note, the viral genomes could  
33 be detected before the beginning of the exponential growth of the epidemic. As importantly, a  
34 marked decrease in the quantities of genomes units was observed concomitantly with the reduction  
35 in the number of new COVID-19 cases which was an expected consequence of the lockdown. As a  
36 conclusion, this work suggests that a quantitative monitoring of SARS-CoV-2 genomes in wastewaters  
37 should bring important and additional information for an improved survey of SARS-CoV-2 circulation  
38 at the local or regional scale.

39

## 40 Introduction

41 SARS-Cov-2 is a positive-sense single-stranded RNA virus of the *Coronaviridae* family and the etiologic  
42 agent of COVID-19, a globalized infection affecting more than 2.5 million people worldwide and  
43 causing more than 180 000 deaths in total, including more than 160 000 cases in France on April 22,  
44 2020. Virus transmission is mainly associated with the projection of respiratory droplets although a  
45 possible contamination through aerosols, contaminated hands and inert surfaces is likely. SARS-Cov-  
46 2 causes severe complications mostly in elderly or people suffering from comorbidity factors (such as  
47 diabetes, hypertension, obesity, acquired or iatrogenic immunosuppression).

48 The viral infection may initiate in the upper respiratory and/or the lower respiratory tracts. Similarly  
49 to SARS-CoV-1 (1) and MERS-CoV (2), SARS-CoV-2 genome was also detected in blood and stools (3–  
50 5). This argue for a possible enteric phase of the infection although isolation of infectious virus from  
51 feces seems difficult (6). Of note diarrhea have been reported in some cases of COVID-19 (6).  
52 Importantly, SARS-CoV-2 genomes could be detected in feces several weeks after it could not be  
53 detected anymore in oral swabs, suggesting that viral excretion in stools may be longer than oral  
54 secretion (7). The presence of viral genomes in stools may open new perspective in the survey of  
55 SARS-CoV-2 carriers. It would notably suggest that the virus could possibly be transmitted by a feco-  
56 oral route, an hypothesis that should likely deserve a careful examination (8) .

57 Management of an epidemic, such as lockdown decision, requires a careful monitoring of the  
58 infected population by detecting the virus in carriers through massive or targeted testing.  
59 Investigating the proportion of people that have been infected through sero-epidemiological surveys  
60 is equally important but antibodies against SARS-CoV-2 will appear only weeks after initial infection  
61 (9,10). In the case of COVID-19, due to the lack of systematic and repeated screening of the  
62 population, the precise number of infected people is difficult to assess, especially because of the high  
63 proportion of infected people that exhibit only few or no symptoms but could secrete and silently  
64 transmit the virus (11–14). Depending on screening kit availability and public health policy, testing  
65 strategy varies between countries which may explain some discrepancy between worldwide data.  
66 Estimating the effective proportion of infected individuals is essential for monitoring the epidemic  
67 spread and to propose adapted and efficient control procedures, such as partial or total lockdown.  
68 France went into lockdown on the March 17 2020, a decision that was expected to have a major  
69 impact on virus circulation especially when asymptomatic carriers are considered to have a strong  
70 impact on virus transmission. This decision was motivated by the urgent need to limit exposure of so-  
71 called fragile people who are at highest risk to develop the most severe forms of the disease  
72 (11,13,15).

73 Analysis of raw wastewaters collected at the inlet of wastewater treatment plants (WWTP) may  
74 provide essential information on the health of the human population that is connected to the WWTP.  
75 It may notably allow measurement and identification of pathogens or drugs that may be difficult to  
76 assess otherwise. Using this method, the European Monitoring Center for Drugs and Drug Addiction  
77 follows drugs and their metabolites in the wastewater of several European cities (16). In addition  
78 previous works on human enteric viruses in urban river and in raw and treated wastewaters  
79 demonstrated that the presence of these viruses was directly linked to epidemic state in the  
80 population (17,18). This strongly argue for a close monitoring of fecal viruses in wastewater as a new  
81 and complementary tool for investigating human epidemics.

82 Enveloped viruses like coronaviruses are expected to be less resistant than naked viruses that are  
83 usually tracked in waste and environmental waters. There is still little information on the persistence  
84 of coronaviruses in waters and most of our current knowledge has been inferred from experiments  
85 made on surrogate viruses. Recent data suggested that infectious SARS-CoV-2 is particularly resistant  
86 in environmental conditions: 3.5 half-life days in the air, 7 days on some surfaces, any reduction at  
87 pH between 3 and 10 (6,19). Previous studies on SARS-CoV-1 indicated a significant persistence at 4  
88 °C even in wastewater (more than 20 days), or a persistence of at least 1 or 2 days at summer  
89 temperatures (1,20,21).

90 Altogether these results led us and others to suggest that the detection of SARS-CoV-2 genomes in  
91 wastewater could provide an early and global tool to monitor virus circulation in addition to human  
92 epidemiological data (22–24).

93 A first publication underlined the putative benefit of a qualitative approach for monitoring SARS-CoV-  
94 2 in wastewaters (24). Other studies used quantitative measurements of viral genomes but the  
95 survey only started at the apex of the epidemic (25). Here, we used a specific reverse-transcription  
96 quantitative PCR (RT-qPCR) method to precisely quantify SARS-CoV-2 genome equivalents in raw  
97 wastewaters of the Parisian area. A 2-months survey covering the lockdown period allowed to  
98 observe an increase and a decrease in the total quantities of viral genomes that paralleled the  
99 number of new COVID-19 cases in the same region. To our knowledge, this is the first real-time  
100 indirect survey of SARS-CoV-2 circulation during a lockdown period.

101

## 102 **Methods**

### 103 **Sample collection**

104 Three WWTP (more than 100 000 inhabitants linked to the station from the Parisian area were  
105 sampled since the start of the epidemic (March 5<sup>th</sup>, 2020). Samples were kept at 4°C and processed  
106 less than 24 hours after sampling.

### 107 **Concentration methods**

108 Samples were homogenized, then 11 ml were centrifugated at 200 000 x g for 1 hour at +4°C. Viral  
109 pellets were resuspended in 400 µL of PBS 1X buffer.

110 200µL of viral concentrate were lysed and extracted using PowerFecal Pro kit (QIAGEN) on a  
111 QIASymphony automated extractor (QIAGEN) according to a modified manufacturer's protocol.  
112 Extracted nucleic acids were filtered through OneStep PCR inhibitor removal kit (Zymoresearch)  
113 according to the manufacturer's instructions.

### 114 **Molecular detection method**

115 The RT-qPCR primers and PCR conditions used herein have been previously described (26). The  
116 amplification was done using Fast virus 1-step Master mix 4x (Lifetechnologies) with oligonucleotide  
117 concentrations recommended previously. Detection and quantification were carried on the E gene by  
118 RT-qPCR. Positive results were confirmed by amplification of a region located within the gene  
119 encoding for the viral RNA-dependent RNA polymerase (RdRp). An internal positive control (IPC) was  
120 added to evaluate the presence of residual inhibitors. The detection limit was estimated to be  
121 around 10<sup>3</sup> genome units per liter of raw wastewater.

122 The quantification was performed using a standard curve based on synthetic oligonucleotide  
123 corresponding to the full-length amplicon on the E gene (SARS-Cov2 Wuhan-Hu isolate sequence  
124 NC\_045512.2). Amplification reaction and fluorescence detection were performed on ViiA7 Real  
125 Time PCR system (Lifetechnologies).

### 126 **Modelization of Viral RNA excretion**

127 Even if the real number of infected people is unknown, we attempted to compute the expected  
128 amount of viral RNA shed in stools, using available information. Since the very beginning of the  
129 epidemic, the daily number of patients consulting at the emergency department of greater Paris  
130 hospitals and diagnosed with COVID symptoms was published  
131 (<https://www.santepubliquefrance.fr/>). Wölfel et al. measured the daily amount of vRNA in swab  
132 samples for few patients (27). This data was used as an estimation of viral expression for all infected

133 people and we also assume that people with symptoms would consult 2 days after the onset of the  
134 illness, and that at any moment the number of patients with strong symptoms was proportional to  
135 the total number of infected people. Accepting the above hypothesis, the convolution of two dataset  
136 (i.e. number of consulting patient and model of excretion) is an emission-proxy, proportional to the  
137 total amount of viral RNA shed in stools in a given population.

## 138 **Results**

139 Three major wastewater treatment plants (WWTP) managing over 75 000 cubic meters per day, were  
140 sampled at the inlet of the plant from March 5<sup>th</sup> to April 23<sup>th</sup> 2020. All processed samples scored  
141 positive for the presence of SARS-CoV-2 genomes as assessed by RT-qPCR on the viral E gene. All  
142 positive samples were confirmed by RT-qPCR on the viral RdRp gene (Figure 1). The COVID-19  
143 epidemic in the same region was illustrated by various indicators such as the total number of COVID-  
144 19 cases treated in the regional hospitals, the accumulation of hospitalized patients or the daily  
145 death toll linked to COVID 19. Based on these epidemiologic statistics and on published data on virus  
146 shedding quantity and delay, an estimated indicator of the viral excretion in the region was  
147 calculated and compared to the viral load in wastewaters.

148 Briefly, the concentration of vRNA in raw wastewater was around  $5 \cdot 10^4$  genome units /L on the 5<sup>th</sup> of  
149 March 2020. At the same date, less than 10 COVID-19 confirmed patients were reported and only  
150 404 individuals were tested positive in France. For the Parisian area more specifically, 91 confirmed  
151 cases were reported at that time (on a total number of more than 12 million inhabitants) and no  
152 death was recorded. Altogether this information indicated that the COVID-19 epidemic was at an  
153 early stage in the Parisian area.

154 The time-course monitoring of viral load in WW displayed an exponential increase (from  $5 \cdot 10^4$  GU/L  
155 on March 5<sup>th</sup> to  $3 \cdot 10^6$  GU/L, a 2-log increase in average). A peak was observed on the 9<sup>th</sup> of April,  
156 followed by a marked decrease (1-log reduction in average). The shape of the concentration curve  
157 was reminiscent of the disease dynamics at the regional level, with an 8-day temporal shift.

158 Altogether these results underline that essential information could be obtain from wastewater  
159 epidemical monitoring, such as early starting of the epidemics, evolution of the infections, and  
160 impact of the lockdown procedures.

161

162 **Discussion**

163 It is demonstrated here for the first time that a quantitative detection of SARS-CoV-2 in wastewaters  
164 could reflect the circulation of the virus in human populations in the Parisian area, a region called Ile-  
165 de-France. Since similar results were obtained from three independent and distant WWTP around  
166 Paris with striking similarities, the time-course survey that has been done is likely to be a direct  
167 reflect of SARS-CoV-2 dynamic in Parisian inhabitants that are connected to these WWTP. It is to note  
168 that at home lockdown is effective since March 17<sup>th</sup> 2020, therefore limiting daily transport.  
169 Importantly no significant rain fall was recorded in the Parisian area that could have had an impact  
170 on virus concentration in wastewaters. More surprisingly this decrease stopped after 7 days, and the  
171 virus concentration has been stable since. This plateau is intriguing, although the emission-proxy  
172 suggests that it can partly be explained by the duration of the virus shedding period, and several  
173 hypotheses can be made. First, one may suggest that many infected people are still secreting viruses  
174 in their feces whereas the virus is not present anymore in the ORL region. This hypothesis has  
175 recently been confirmed in Chinese patients with longer periods of excretion than reported by Wölfel  
176 (7). Second, lockdown has been partial since some specific workers have been allowed to pursue  
177 essential activities that were not compatible with homeworking. These people are usually not  
178 considered at risk of severe infections (i.e. more pauci-symptomatic case), but they may promote  
179 virus circulation at a low level notably in their family if they do not strictly respect hands cleaning and  
180 mask wearing. Third, one may suggest that lockdown is not respected by few people that maintain  
181 virus circulation at a low but significant level. Virus survey in the same WWTP will likely provide some  
182 answers in the following weeks.

183 The observed delay between epidemiological curves in humans compared to virus quantification in  
184 wastewaters is probably due to several parameters. This may include the effective number of  
185 infected people, the timing and temporal kinetics of viral shredding in feces and other causes that  
186 are still to be investigated. Nevertheless, our data are in very good agreement with epidemiological  
187 parameters such as the number of confirmed COVID-19 patients or our excretion model. To that  
188 respect, let us note that our study provides a strong indirect evidence for a significant reduction of  
189 virus transmission in response to lockdown. According to our results, the number of people  
190 producing SARS-CoV-2 is likely underestimated when based on individual testing, especially during a  
191 pandemic where a limited quantity of virological tests did not allow for extensive testing so far. As a  
192 comparison the quantity of human enteric virus concentration in raw wastewater is around  $10^6$  per  
193 liter (17).

194 Epidemiological investigations that have been conducted on the Diamond Princess cruise ship  
195 suggested that less than 20% of infected people were asymptomatic (12). Most of the infected  
196 people were reported to exhibit moderate nonspecific symptoms including fever, headache, body  
197 aches, intense tiredness and/or dry cough. However infected people can produce SARS-CoV-2 for a  
198 few days before the onset of symptoms and up to several days after recovery (2,7,28). Another  
199 extensive study based on Iceland population shows that 43% of SARS-CoV-2 positive patients did not  
200 report any symptoms (29). In this context, a clear majority of infected carriers may silently  
201 contaminate sensitive people. This led us to suggest that the contamination of raw wastewaters may  
202 occur before the significant appearance of clinical cases. The evolution of SARS-CoV-2 viral load in  
203 wastewater was in good agreement with the dynamics of pandemic during the first wave of infection  
204 in urbanized area, which is also in agreement with the excretion model that is proposed here. To our  
205 knowledge this is the first report demonstrating that the quantitative monitoring of SARS-CoV-2 in  
206 raw wastewater is a time-related relevant indicator of the evolution of the health status of a  
207 population linked to a sewage network. This quantitative approach was especially useful to  
208 unveil the dynamics of the pandemic and follow impact of government measures such as  
209 containment.

210 To finish, this data, if carefully utilized, could help to describe the proportion of SARS-CoV-2 excretors  
211 during all the monitored pandemic event and allow to calculate the immunity of the population,  
212 especially at the local level.

## 213 **Conclusions**

214 Our results strongly argue for the use of a quantitative monitoring of SARS-CoV-2 genomes in urban  
215 wastewaters. This would also argue for a long-time conservation of wastewater samples in dedicated  
216 local i.e. wastewater-bank, which would allow a retrospective investigation of pathogens circulation.  
217 Additionally, wastewaters survey may provide an alternative and possibly early tool to detect  
218 pathogens in populations when investigations in humans are difficult to conduct for logistic, ethical  
219 or economic reasons, notably in poor countries that are strongly exposed to COVID-19 epidemic.

220



221

## 222 Reference

- 223 1. Wang X-W, Li J-S, Guo T-K, Zhen B, Kong Q-X, Yi B, et al. Concentration and detection of SARS  
224 coronavirus in sewage from Xiao Tang Shan Hospital and the 309th Hospital. *Journal of Virological*  
225 *Methods*. sept 2005;128(12):156-61.
- 226 2. Zhou J, Li C, Zhao G, Chu H, Wang D, Yan HH-N, et al. Human intestinal tract serves as an alternative  
227 infection route for Middle East respiratory syndrome coronavirus. *Sci Adv*. nov  
228 2017;3(11):eaao4966.
- 229 3. Zhang W, Du R-H, Li B, Zheng X-S, Yang X-L, Hu B, et al. Molecular and serological investigation of  
230 2019-nCoV infected patients: implication of multiple shedding routes. *Emerging Microbes &*  
231 *Infections*. 1 janv 2020;9(1):386-9.
- 232 4. Zhang H, Kang Z, Gong H, Xu D, Wang J, Li Z, et al. The digestive system is a potential route of 2019-  
233 nCov infection: a bioinformatics analysis based on single-cell transcriptomes [Internet].  
234 *Microbiology*; 2020 janv [cité 28 avr 2020]. Disponible sur:  
235 <http://biorxiv.org/lookup/doi/10.1101/2020.01.30.927806>
- 236 5. Wu Y, Guo C, Tang L, Hong Z, Zhou J, Dong X, et al. Prolonged presence of SARS-CoV-2 viral RNA in  
237 faecal samples. *Lancet Gastroenterol Hepatol*. 19 mars 2020;
- 238 6. Chen N, Zhou M, Dong X, Qu J, Gong F, Han Y, et al. Epidemiological and clinical characteristics of 99  
239 cases of 2019 novel coronavirus pneumonia in Wuhan, China: a descriptive study. *The Lancet*. févr  
240 2020;395(10223):507-13.
- 241 7. Chen C, Gao G, Xu Y, Pu L, Wang Q, Wang L, et al. SARS-CoV-2–Positive Sputum and Feces After  
242 Conversion of Pharyngeal Samples in Patients With COVID-19. *Ann Intern Med* [Internet]. 30 mars  
243 2020 [cité 28 avr 2020]; Disponible sur: [https://annals.org/aim/fullarticle/2764036/sars-cov-2-](https://annals.org/aim/fullarticle/2764036/sars-cov-2-positive-sputum-feces-after-conversion-pharyngeal-samples)  
244 [positive-sputum-feces-after-conversion-pharyngeal-samples](https://annals.org/aim/fullarticle/2764036/sars-cov-2-positive-sputum-feces-after-conversion-pharyngeal-samples)
- 245 8. Yeo C, Kaushal S, Yeo D. Enteric involvement of coronaviruses: is faecal–oral transmission of SARS-  
246 CoV-2 possible? *The Lancet Gastroenterology & Hepatology*. avr 2020;5(4):335-7.
- 247 9. Grzelak L, Temmam S, Planchais C, Demeret C, Huon C, Guivel F, et al. SARS-CoV-2 serological  
248 analysis of COVID-19 hospitalized patients, pauci-symptomatic individuals and blood donors.  
249 [Internet]. *Infectious Diseases (except HIV/AIDS)*; 2020 avr [cité 28 avr 2020]. Disponible sur:  
250 <http://medrxiv.org/lookup/doi/10.1101/2020.04.21.20068858>
- 251 10. Assis RR de, Jain A, Nakajima R, Jasinskas A, Felgner J, Obiero JM, et al. Analysis of SARS-CoV-2  
252 Antibodies in COVID-19 Convalescent Plasma using a Coronavirus Antigen Microarray [Internet].  
253 *Immunology*; 2020 avr [cité 28 avr 2020]. Disponible sur:  
254 <http://biorxiv.org/lookup/doi/10.1101/2020.04.15.043364>
- 255 11. Li R, Pei S, Chen B, Song Y, Zhang T, Yang W, et al. Substantial undocumented infection facilitates the  
256 rapid dissemination of novel coronavirus (SARS-CoV2). *Science*. 16 mars 2020;eabb3221.
- 257 12. Mizumoto K, Kagaya K, Zarebski A, Chowell G. Estimating the asymptomatic proportion of  
258 coronavirus disease 2019 (COVID-19) cases on board the Diamond Princess cruise ship, Yokohama,  
259 Japan, 2020. *Eurosurveillance* [Internet]. 12 mars 2020 [cité 28 avr 2020];25(10). Disponible sur:  
260 <https://www.eurosurveillance.org/content/10.2807/1560-7917.ES.2020.25.10.2000180>

- 261 13. Al-Tawfiq JA. Asymptomatic coronavirus infection: MERS-CoV and SARS-CoV-2 (COVID-19). *Travel*  
262 *Med Infect Dis.* 27 févr 2020;101608.
- 263 14. Rothe C, Schunk M, Sothmann P, Bretzel G, Froeschl G, Wallrauch C, et al. Transmission of 2019-  
264 nCoV Infection from an Asymptomatic Contact in Germany. *N Engl J Med.* 5 mars  
265 2020;382(10):970-1.
- 266 15. Ng SC, Tilg H. COVID-19 and the gastrointestinal tract: more than meets the eye. *Gut.* 9 avr 2020;
- 267 16. González-Mariño I, Zuccato E, Santos MM, Castiglioni S. Monitoring MDMA metabolites in urban  
268 wastewater as novel biomarkers of consumption. *Water Research.* mai 2017;115:1-8.
- 269 17. Bisseux M, Colombet J, Mirand A, Roque-Afonso A-M, Abravanel F, Izopet J, et al. Monitoring human  
270 enteric viruses in wastewater and relevance to infections encountered in the clinical setting: a one-  
271 year experiment in central France, 2014 to 2015. Vol. 23, *Eurosurveillance.* 2018. p. 17-00237.
- 272 18. Prevost B, Lucas FS, Ambert-Balay K, Pothier P, Moulin L, Wurtzer S. Deciphering the Diversities of  
273 Astroviruses and Noroviruses in Wastewater Treatment Plant Effluents by a High-Throughput  
274 Sequencing Method. *Appl Environ Microbiol.* oct 2015;81(20):7215-22.
- 275 19. van Doremalen N, Bushmaker T, Morris DH, Holbrook MG, Gamble A, Williamson BN, et al. Aerosol  
276 and Surface Stability of SARS-CoV-2 as Compared with SARS-CoV-1. *N Engl J Med.* 17 mars 2020;
- 277 20. Gundy PM, Gerba CP, Pepper IL. Survival of Coronaviruses in Water and Wastewater. *Food Environ*  
278 *Virol.* mars 2009;1(1):10.
- 279 21. Ye Y, Ellenberg RM, Graham KE, Wigginton KR. Survivability, Partitioning, and Recovery of Enveloped  
280 Viruses in Untreated Municipal Wastewater. *Environ Sci Technol.* 17 mai 2016;50(10):5077-85.
- 281 22. Lodder W, de Roda Husman AM. SARS-CoV-2 in wastewater: potential health risk, but also data  
282 source. *Lancet Gastroenterol Hepatol.* 1 avr 2020;
- 283 23. Mallapaty S. How sewage could reveal true scale of coronavirus outbreak. *Nature.* avr  
284 2020;580(7802):176-7.
- 285 24. Medema G, Heijnen L, Elsinga G, Italiaander R, Brouwer A. Presence of SARS-Coronavirus-2 in  
286 sewage. *medRxiv.* 1 janv 2020;2020.03.29.20045880.
- 287 25. Wu F, Xiao A, Zhang J, Gu X, Lee WL, Kauffman K, et al. SARS-CoV-2 titers in wastewater are higher  
288 than expected from clinically confirmed cases. *medRxiv.* 1 janv 2020;2020.04.05.20051540.
- 289 26. Corman VM, Landt O, Kaiser M, Molenkamp R, Meijer A, Chu DKW, et al. Detection of 2019 novel  
290 coronavirus (2019-nCoV) by real-time RT-PCR. *Euro Surveill.* janv 2020;25(3).
- 291 27. Wölfel R, Corman VM, Guggemos W, Seilmaier M, Zange S, Müller MA, et al. Virological assessment  
292 of hospitalized patients with COVID-2019. *Nature [Internet].* 1 avr 2020 [cité 28 avr 2020];  
293 Disponible sur: <http://www.nature.com/articles/s41586-020-2196-x>
- 294 28. Atkinson B, Petersen E. SARS-CoV-2 shedding and infectivity. *The Lancet.* avr  
295 2020;395(10233):1339-40.
- 296 29. Gudbjartsson DF, Helgason A, Jonsson H, Magnusson OT, Melsted P, Norddahl GL, et al. Spread of  
297 SARS-CoV-2 in the Icelandic Population. *N Engl J Med.* 14 avr 2020;NEJMoa2006100.

299

300 **Acknowledgment**

301 Olivier Rousselot (director of “laboratoires et de l'environnement”, SIAAP) is acknowledged for his  
302 support and critical reading of the manuscript. Vincent Rocher for management of sampling at the  
303 SIAAP Innovation department. Technical assistance from the R&D Eau de Paris Laboratory members,  
304 and Alban Robin for helpful support.

305 **Contribution**

306 SW, ER performed the virus measurements; SW, LM started the project; JLA, SW provided samples;  
307 LM, VM, JMM, SW for the redaction of the manuscript; YM, RT, JLA technical and theoretical discussion  
308 .

309 **Funding**

310 Analysis were carried on the Eau de Paris 2020 Research grant. Samples were provided by SIAAP.

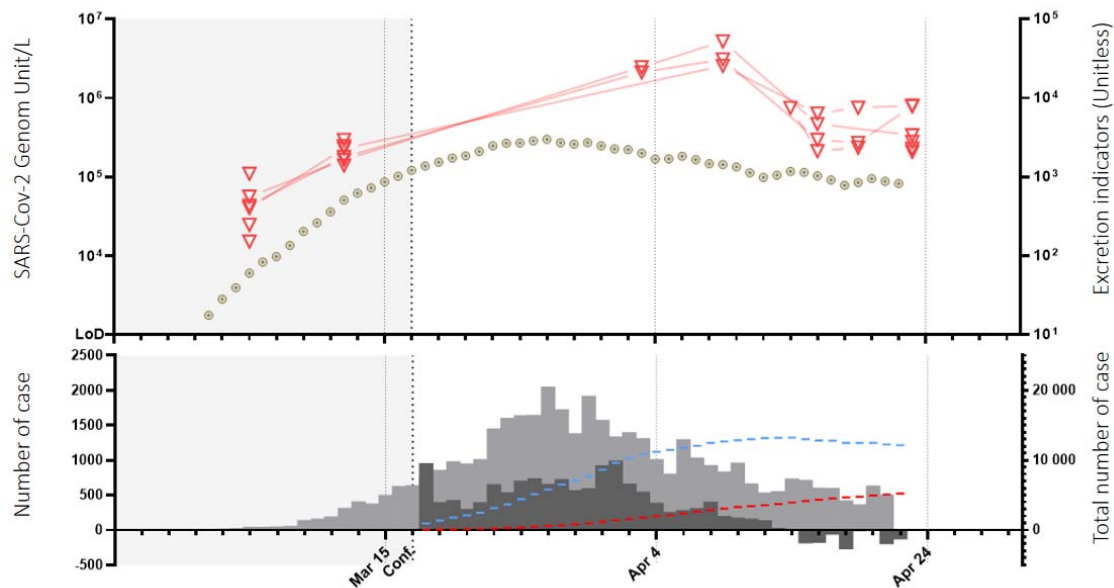

311

312 **Figure 1: Upper panel: Quantification of SARS-Cov-2 in wastewater samples in Parisian Area in**  
313 **different WWTP (open inverted red triangles for important WWTP, purple open inverted triangles**  
314 **for smaller WWTP) in circle estimators of the viral excretion.**

315 **Lower panel : In Light grey area, daily number of consultation for COVID 19 Symptoms in hospital**  
316 **of the Parisian area. Dark grey daily growth of hospitalized patient. Blue bar total hospitalized**  
317 **patient in the Parisian area, red bar cumulative deaths each day, in Parisian area.**

318 **Both panel : grey background, pre-lockdown period.**

319

320

321

322 **Supplementary data**

323 None

324
